# Supplementary material for: Hierarchical integration of mitochondrial and nuclear positioning pathways by the Num1 EF hand
Source: PubMed Central journal article supplement — Mol Biol Cell. 2022 Jan 27;33(2):ar20. doi: 10.1091/mbc.E21-12-0610-T (PMC9236139; doi:10.1091/mbc.e21-12-0610-t), 2022-01-27
Supplement: mbc-33-ar20-s001.pdf [file mbc-33-ar20-s001.pdf]

# Supplemental Materials

*Molecular Biology of the Cell*

Anderson *et al.*

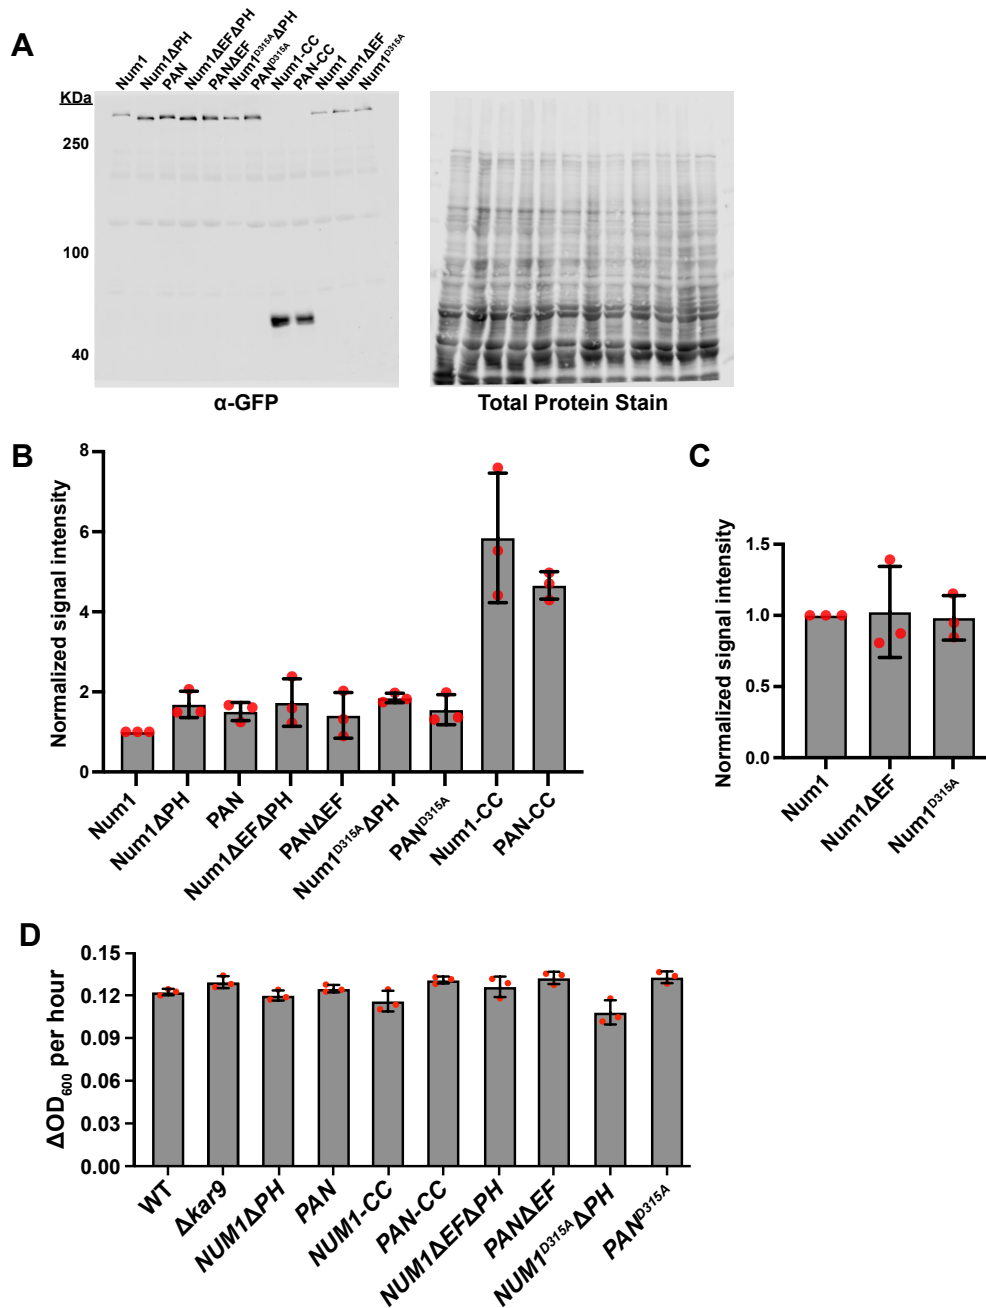

**Figure S1. Characterization of synthetically clustered Num1 truncations**

(A) Whole cell extracts were analyzed by SDS-PAGE and Western blot for the indicated strains using anti-GFP (left). Total protein stain of the blot (right) was used as the loading control.

(B) Quantified relative protein levels for Num1, Num1ΔPH, PAN, Num1ΔEF, PANΔEF, Num1<sup>D315A</sup>ΔPH, PAN<sup>D315A</sup>, Num1-CC, and PAN-CC are shown as the mean ± SD. Each dot represents a biological replicate, n=3 replicates.

(C) Quantified relative protein levels for Num1, Num1ΔEF, and Num1<sup>D315A</sup> are shown as the mean ± SD. Each dot represents a biological replicate, n=3 replicates.

(D) The change in OD<sub>600</sub> per hour for the linear portion of growth curves of wildtype W303

(replicated from Fig. 2C),  $\Delta kar9$  (replicated from Fig. 2C),  $NUM1\Delta PH$ ,  $PAN$ ,  $NUM1-CC$ ,  $PAN-CC$ ,  $NUM1\Delta EF$ ,  $PAN\Delta EF$ ,  $NUM1^{D315A}\Delta PH$ , and  $PAN^{D315A}$ . Three individual biological replicates are shown, each represented by a dot. Each biological replicate is the average of 3-4 technical replicates, mean  $\pm$  SD is shown.

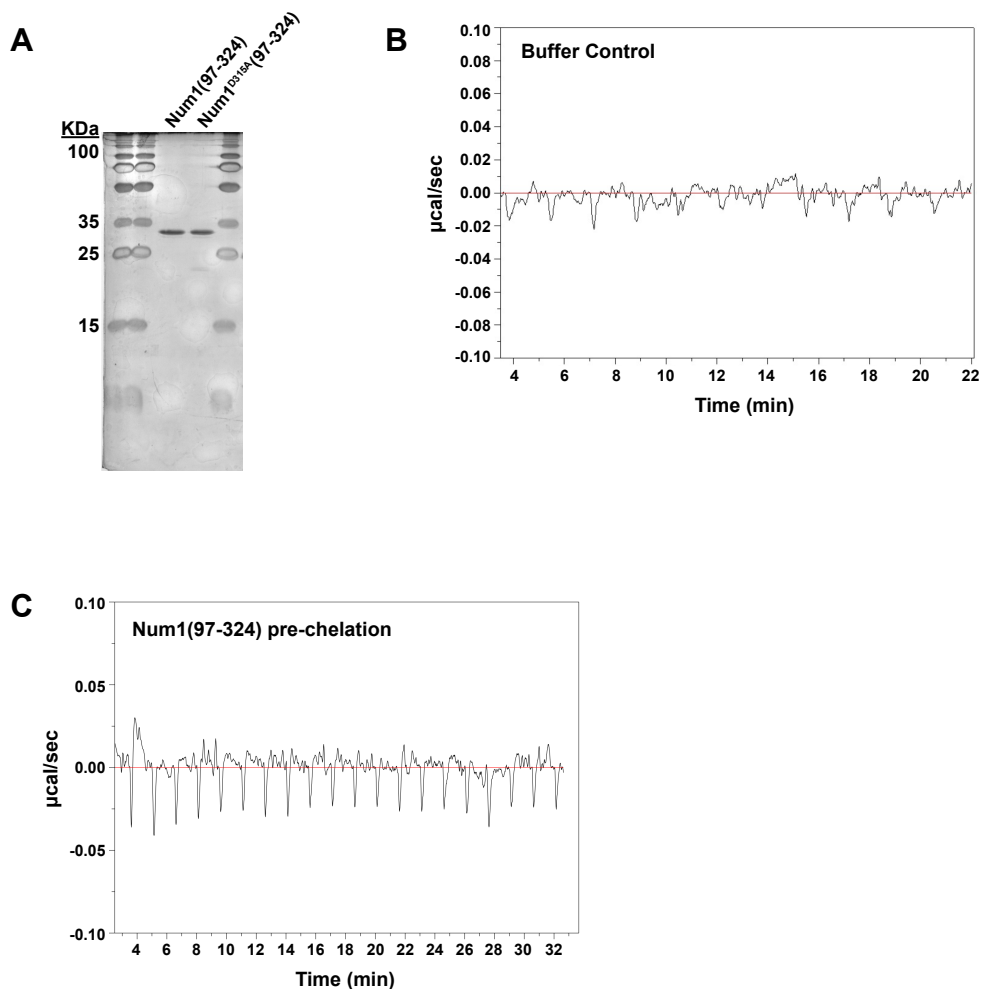

**Figure S2. ITC buffer and Num1(97-324) non-EGTA treated controls**

(A) Non-cropped silver stained 15% SDS-PAGE gel showing purified Num1(97-324) and Num1<sup>D315A</sup>(97-324) from Fig. 3A, highlighting the absence of impurities and protein breakdown.

(B) ITC experiment buffer control. Calorimetric titration using only dialysis buffer under the same parameters as in Fig. 3B.

(C) Calorimetric titration of 50 µM Num1(97-324) that was not treated with EGTA using parameters as in Fig. 3B.

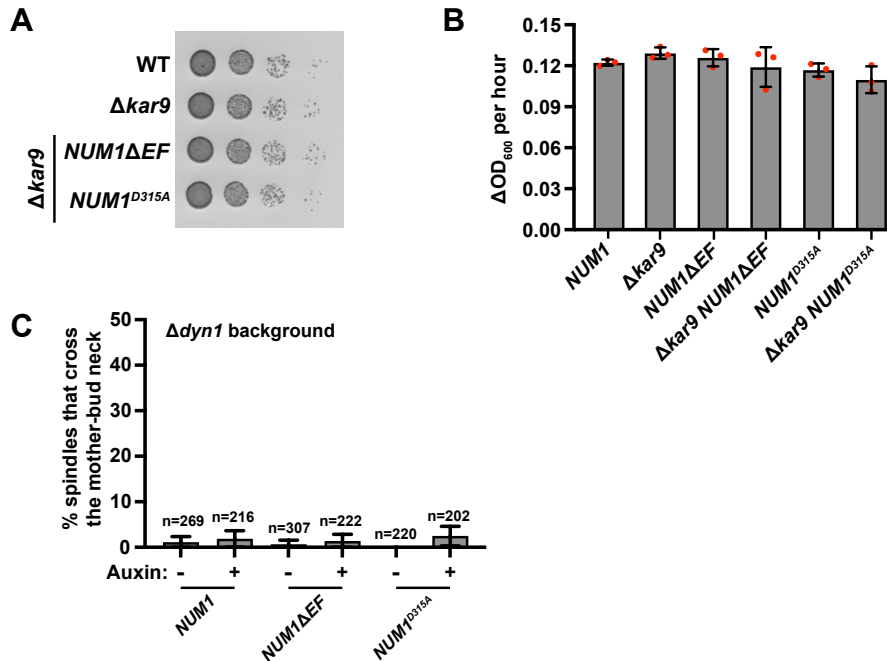

**Figure S3. Characterization of dynein activity for full length Num1 EFLM mutants**

(A) Tenfold serial dilutions of wildtype W303,  $\Delta kar9$ ,  $\Delta kar9 NUM1\Delta EF$ , and  $\Delta kar9 NUM1^{D315A}$  were plated on YPD medium and grown at 30°C for 24 h. This is a representative example of four replicates.

(B) The changes in  $OD_{600}$  per hour for the linear portion of growth curves of WT W303 (replicated from Fig. 2C),  $\Delta kar9$  (replicated from Fig. 2C),  $NUM1\Delta EF$ ,  $\Delta kar9 NUM1\Delta EF$ ,  $NUM1^{D315A}$ , and  $\Delta kar9 NUM1^{D315A}$ . Three individual biological replicates are shown, each represented by a dot. Each biological replicate is the average of 3-4 technical replicates, mean  $\pm$  SD is shown.

(C) Quantification of the percentage of hydroxyurea arrested spindles that crossed the mother-bud neck in the absence and presence of auxin, as indicated under the graph, during a 10 min time lapse movie for  $NUM1$ ,  $NUM1\Delta EF$ , and  $NUM1^{D315A} mito^{AID}$  cells harboring mRuby-TUB1 in a  $\Delta dyn1$  background.  $n \geq 202$  spindles. Standard error of the proportion with a 95% confidence interval is shown.

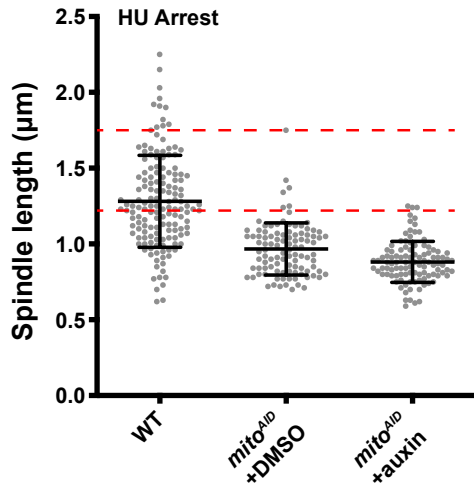

**Figure S4. Quantification of pre-anaphase spindle lengths**

Quantification of pre-anaphase hydroxyurea arrested spindle lengths for WT, *mito<sup>AID</sup>* -Auxin, and *mito<sup>AID</sup>* +Auxin. Red dashed lines indicate 1.25 µm and 1.75 µm. n ≥ 102 spindles.

**Supplemental Table 1. Primer List**

| <b>LL Primer#</b> | <b>Sequence</b>                                                                    |
|-------------------|------------------------------------------------------------------------------------|
| 112               | CGCGGATCCATGAACTTTACTTTGGA ACTAAGCGAGAATTTGTTG                                     |
| 115               | GCAGCTCGAGCTAGTCAATTTGATCACTATATCAAAAATGTCTTCTTCAC                                 |
| 177               | GACATAGAGTACCACAAAGCCGATCATTGGCAATTTACGAGGTGACGGTG<br>CTGGTTTA                     |
| 178               | GATTATTATTGTTCTTAATTTACTTAGAGTTATTTAGTTTTTTTAATCGATGAA<br>TTCGAGCTCG               |
| 226               | GTGAAGGTGAAGGTGATGCTAC                                                             |
| 259               | CTGCCAGTAGGACGGCATCTTTACAACTTTAGCATCATTGGGTGACGGTG<br>CTGGTTTA                     |
| 433               | TTGGA ACTAAGCGAGAATTTGTTGGTTGAGTGTAGGAAATTGCAA                                     |
| 434               | TTGCAATTTCTACTCAACCAACAAATTCTCGCTTAGTTCCAA                                         |
| 437               | GCTCACGTAGTCTTCTTTTTTGAGTAATAAATAATCTG                                             |
| 456               | TCCGATACTACAGTAACATCTATTTTTGATATAGTGATCGAA                                         |
| 457               | TTCGATCACTATATCAAAAATAGATGTTACTGTAGTATCGGA                                         |
| 458               | GGGACCACTAGTGAAGAAGCCATTTTTGATATAGTGATCGAA                                         |
| 459               | TTCGATCACTATATCAAAAATGGCTTCTTCACTAGTGGTCCC                                         |
| 513               | CGAGTAAAGACGCAACGGTCAAGGCTTTCCACGAGACGTTCGAATATGTCC<br>CACAACAACAGGCATAAAAAGAATAAC |
| 513               | TCGTAAATTGCCAAATGATCGGCTTTGTGGTACTCTATGTC                                          |
| 514               | GCAGCTCGAGCTAGTCAATTTGATCACTATATCAAAAATGGCTTCTTCAC                                 |
| 933               | CAAAGAAGTATTATCAAAAACAGCATACTTCCGATACTACAGTAACATCTG<br>GTGACGGTGCTGGTTTA           |
| 940               | TAAACCAGCACCGTCACCCAATGATGCTAAAGTTTGTAAGATGCCGTCCTA<br>CTGGCAG                     |

## Supplemental Table 2. Strain list

### Note the following abbreviations:

*NUM1* $\Delta$ *PH* = *NUM1*(aa1-2562)

*NUM1-CC* = *NUM1*(aa1-303)

*NUM1* $\Delta$ *EF* $\Delta$ *PH* = *NUM1*(aa1-2562  $\Delta$ aa304-315)

*NUM1*<sup>D315A</sup> $\Delta$ *PH* = *NUM1*(aa1-2562 with point mutation D315A)

*NUM1* $\Delta$ *EF* = *NUM1*( $\Delta$ aa304-315)

*NUM1*<sup>D315A</sup> = *NUM1*(point mutation D315A)

*PIL1-LaG16* = *PIL1- $\alpha$ GFP*

*PIL1-LaG16 NUM1* $\Delta$ *PH-yEGFP* = *PAN*

*PIL1-LaG16 NUM1-CC-yEGFP* = *PAN-CC*

*PIL1-LaG16 NUM1* $\Delta$ *EF* $\Delta$ *PH-yEGFP* = *PAN* $\Delta$ *EF*

*PIL1-LaG16 NUM1*<sup>D315A</sup> $\Delta$ *PH-yEGFP* = *PAN*<sup>D315A</sup>

*MMR1-AID-6FLAG::HYG*  $\Delta$ *ypt11::NAT TIR1::URA* = *mito*<sup>AID</sup>

| LLY     | Genotype                                                                                             | Source                  |
|---------|------------------------------------------------------------------------------------------------------|-------------------------|
| 92/93   | W303 ( <i>ade2-1;leu2-3;his3-11,15;trp1-1;ura3-1;can1-100</i> )                                      |                         |
| 27/28   | W303 $\Delta$ <i>num1::HIS</i>                                                                       | Ping et al., 2016       |
| 123     | W303 <i>NUM1-yEGFP::HIS</i> / pYX142-mito-RED:: <i>LEU</i>                                           | Lackner et al., 2013    |
| 124     | W303 <i>NUM1</i> $\Delta$ <i>PH-yEGFP::HIS</i> / pYX142-mito-RED:: <i>LEU</i>                        | Lackner et al., 2013    |
| 153     | W303 <i>NUM1-yEGFP::KAN</i>                                                                          | Lackner et al., 2013    |
| 330     | W303 $\Delta$ <i>kar9::NAT</i>                                                                       | Schmit et al., 2018     |
| 647/648 | W303 $\Delta$ <i>num1::KAN</i>                                                                       | Kraft and Lackner, 2017 |
| 1103    | W303 <i>NUM1</i> <sup>D315A</sup> - <i>yEGFP::HIS</i>                                                | This study              |
| 1133    | W303 <i>NUM1</i> <sup>D315A</sup> - <i>yEGFP::KAN</i> / pYX142-mito-RED:: <i>LEU</i>                 | This study              |
| 1184    | W303 <i>PIL1-LaG16::CaURA3</i>                                                                       | Schmit et al., 2018     |
| 1187    | W303 <i>PIL1-LaG16::CaURA3 NUM1</i> $\Delta$ <i>PH-yEGFP::HIS</i>                                    | Schmit et al., 2018     |
| 1223    | W303 <i>NUM1</i> $\Delta$ <i>EF-yEGFP::HIS</i>                                                       | This study              |
| 1224    | W303 <i>NUM1</i> $\Delta$ <i>EF-yEGFP::HIS</i> / pYX142-mito-RED:: <i>LEU</i>                        | This study              |
| 1366    | W303 <i>MMR1-AID-6FLAG::HYG</i> $\Delta$ <i>ypt11::NAT TIR1::URA</i>                                 | Kraft and Lackner, 2017 |
| 1720    | W303 <i>NUM1-yEGFP::HIS PHO88-mCherry::LEU</i>                                                       | This study              |
| 1824    | W303 <i>PIL1-LaG16::CaURA3 NUM1</i> $\Delta$ <i>PH-yEGFP::HIS</i><br>pHIS3p:mRuby2- <i>TUB1::HYG</i> | This study              |



|      |                                                                                            |                     |
|------|--------------------------------------------------------------------------------------------|---------------------|
| 1906 | W303 $\Delta kar9::NAT$ NUM1 $\Delta PH$ -yEGFP::HIS                                       | Schmit et al., 2018 |
| 1908 | W303 $\Delta kar9::NAT$ PIL1-LaG16::CaURA3 NUM1 $\Delta PH$ -yEGFP::HIS                    | Schmit et al., 2018 |
| 1977 | W303 NUM1 $\Delta PH$ -yEGFP::HIS pHIS3p:mRuby2-TUB1::HYG                                  | Schmit et al., 2018 |
| 2033 | W303 NUM1 $\Delta PH$ -yEGFP::HIS                                                          | Schmit et al., 2018 |
| 2076 | W303 PIL1-LaG16::CaURA3 NUM1 $\Delta PH$ -yEGFP::HIS /pYX142-mito-RED::LEU                 | Schmit et al., 2018 |
| 2085 | W303 $\Delta Inp1::KAN$                                                                    | This study          |
| 2139 | W303 pHIS3p:mRuby2-TUB1::HYG                                                               | Schmit et al., 2018 |
| 2141 | W303 $\Delta num1::HIS$ pHIS3p:mRuby2-TUB1::HYG                                            | Schmit et al., 2018 |
| 2275 | W303 NUM1-CC-yEGFP::HIS                                                                    | Ping et al., 2016   |
| 2278 | W303 PIL1-LaG16::CaURA3 NUM1-CC-yEGFP::HIS                                                 | This study          |
| 2335 | W303 $\Delta kar9::NAT$ NUM1-CC-yEGFP::HIS                                                 | This study          |
| 2337 | W303 $\Delta kar9::NAT$ PIL1-LaG16::CaURA3 NUM1-CC-yEGFP::HIS                              | This study          |
| 2339 | W303 NUM1-CC-yEGFP::HIS / pYX142-mito-RED::LEU                                             | Ping et al., 2016   |
| 2341 | W303 PIL1-LaG16::CaURA3 NUM1-CC-yEGFP::HIS / pYX142-mito-RED::LEU                          | This study          |
| 2343 | W303 NUM1-CC-yEGFP::HIS pHIS3p:mRuby2-TUB1::HYG                                            | This study          |
| 2345 | W303 PIL1-LaG16::CaURA3 NUM1-CC-yEGFP::HIS pHIS3p:mRuby2-TUB1::HYG                         | This study          |
| 2582 | W303 PIL1-LaG16::CaURA3 NUM1 $\Delta EF\Delta PH$ -yEGFP::HIS                              | This study          |
| 2649 | W303 NUM1 $\Delta EF\Delta PH$ -yEGFP::HIS                                                 | This study          |
| 3085 | W303 PIL1-LaG16::CaURA3 NUM1 $\Delta EF\Delta PH$ -yEGFP::HIS pHIS3p:mRuby2-TUB1::HYG      | This study          |
| 3144 | W303 $\Delta kar9::NAT$ NUM1 $\Delta EF\Delta PH$ -yEGFP::HIS                              | This study          |
| 3145 | W303 $\Delta kar9::NAT$ PIL1-LaG16::CaURA3 NUM1 $\Delta EF\Delta PH$ -yEGFP::HIS           | This study          |
| 3499 | W303 PIL1-LaG16::CaURA3 NUM1 $\Delta PH$ -yEGFP::HIS DYN1-mKate::HIS TEF::mito-TagBFP::TRP | This study          |
| 3500 | W303 PIL1-LaG16::CaURA3 NUM1-CC-yEGFP::HIS DYN1-                                           | This study          |

|      |                                                                                                                                                           |            |
|------|-----------------------------------------------------------------------------------------------------------------------------------------------------------|------------|
|      | <i>mKate::HIS TEF::mito-TagBFP::TRP</i>                                                                                                                   |            |
| 3501 | W303 <i>PIL1-LaG16::CaURA3 NUM1ΔEFΔPH-yEGFP::HIS DYN1-mKate::HIS TEF::mito-TagBFP::TRP</i>                                                                | This study |
| 3564 | W303 <i>NUM1<sup>D315A</sup>ΔPH-yEGFP::KAN</i>                                                                                                            | This study |
| 3575 | W303 <i>NUM1-yEGFP::KAN DYN1-mKate::HIS TEF::mito-TagBFP::TRP</i>                                                                                         | This study |
| 3576 | W303 <i>NUM1ΔEF-yEGFP::HIS MMR1-AID-6FLAG::HYG Δypt11::NAT TIR1::URA pHIS3p:mRuby2-TUB1::LEU TEF::mito-TagBFP::TRP</i>                                    | This study |
| 3577 | W303 <i>PIL1-LaG16::CaURA3 NUM1ΔEFΔPH-yEGFP::HIS MMR1-AID-6FLAG::HYG Δypt11::NAT TIR1::URA pHIS3p:mRuby2-TUB1::LEU TEF::mito-TagBFP::TRP</i>              | This study |
| 3597 | W303 <i>NUM1ΔEFΔPH-yEGFP::HIS pHIS3p:mRuby2-TUB1::HYG</i>                                                                                                 | This study |
| 3603 | W303 <i>PIL1-LaG16::CaURA3 NUM1<sup>D315A</sup>ΔPH-yEGFP::KAN</i>                                                                                         | This study |
| 3607 | W303 <i>PIL1-LaG16::CaURA3 NUM1<sup>D315A</sup>ΔPH-yEGFP::KAN DYN1-mKate::HIS TEF::Mito-TagBFP::TRP</i>                                                   | This study |
| 3647 | W303 <i>NUM1ΔEF-yEGFP::HIS pHIS3p:mRuby2-TUB1::LEU</i>                                                                                                    | This study |
| 3649 | W303 <i>NUM1ΔEF-yEGFP::HIS DYN1-mKate::HIS TEF::MitoTag-BFP::TRP</i>                                                                                      | This study |
| 3713 | W303 <i>PIL1-LaG16::CaURA3 NUM1<sup>D315A</sup>ΔPH-yEGFP::KAN pHIS3p:mRuby2-TUB1::HYG</i>                                                                 | This study |
| 3739 | W303 <i>PIL1-LaG16::CaURA3 NUM1<sup>D315A</sup>ΔPH-yEGFP::HIS MMR1-AID-6FLAG::HYG Δypt11::NAT TIR1::URA pHIS3p:mRuby2-TUB1::LEU TEF::mito-TagBFP::TRP</i> | This study |
| 3740 | W303 <i>PIL1-LaG16::CaURA3 NUM1ΔEFΔPH-yEGFP::HIS / pYX142-mito-RED::LEU</i>                                                                               | This study |
| 3742 | W303 <i>PIL1-LaG16::CaURA3 NUM1<sup>D315A</sup>ΔPH-yEGFP::HIS / pYX142-mito-RED::LEU</i>                                                                  | This study |
| 3766 | W303 <i>Δkar9::NAT NUM1<sup>D315A</sup>ΔPH-yEGFP::KAN</i>                                                                                                 | This study |
| 3767 | W303 <i>Δkar9::NAT PIL1-LaG16::CaURA3 NUM1<sup>D315A</sup>ΔPH-yEGFP::KAN</i>                                                                              | This study |
| 3809 | W303 <i>PIL1-LaG16::CaURA3 NUM1ΔPH-yEGFP::HIS MMR1-AID-6FLAG::HYG Δypt11::NAT TIR1::URA pHIS3p:mRuby2-TUB1::LEU TEF::Mito-TagBFP::TRP</i>                 | This study |

|      |                                                                                                                                                                  |            |
|------|------------------------------------------------------------------------------------------------------------------------------------------------------------------|------------|
| 3905 | W303 $\Delta kar9::NAT$ NUM1 $\Delta EF$ -yEGFP::HIS                                                                                                             | This study |
| 3906 | W303 $\Delta kar9::NAT$ NUM1 <sup>D315A</sup> -yEGFP::HIS                                                                                                        | This study |
| 3915 | W303 NUM1-yEGFP::HIS MMR1-AID-6FLAG::HYG<br>$\Delta ypt11::NAT$ TIR1::URA mRuby-Tub1::LEU<br>TEF::MitoTagBFP::TRP                                                | This study |
| 4103 | W303 MMR1-AID-6FLAG::HYG $\Delta ypt11::NAT$ TIR1::URA<br>$\Delta dyn1::NAT$ NUM1-yEGFP::HIS pHIS3p:mRuby2-<br>TUB1::LEU TEF::Mito-TagBFP::TRP                   | This study |
| 4166 | W303 NUM1 <sup>D315A</sup> -yEGFP::HIS pHIS3p:mRuby2-TUB1::LEU                                                                                                   | This study |
| 4167 | W303 NUM1 <sup>D315A</sup> -yEGFP::HIS DYN1-mKate::HIS<br>TEF::Mito-TagBFP::TRP                                                                                  | This study |
| 4168 | W303 MMR1-AID-6FLAG::HYG $\Delta ypt11::NAT$ TIR1::URA<br>NUM1 <sup>D315A</sup> -yEGFP::HIS pHIS3p:mRuby2-TUB1::LEU<br>TEF::Mito-TagBFP::TRP                     | This study |
| 4175 | W303 $\Delta dyn1::NAT$ MMR1-AID-6FLAG::HYG $\Delta ypt11::NAT$<br>TIR1::URA NUM1 $\Delta EF$ -yEGFP::HIS pHIS3p:mRuby2-<br>TUB1::LEU TEF::Mito-TagBFP::TRP      | This study |
| 4269 | W303 $\Delta dyn1::NAT$ MMR1-AID-6FLAG::HYG $\Delta ypt11::NAT$<br>TIR1::URA NUM1 <sup>D315A</sup> -yEGFP::HIS pHIS3p:mRuby2-<br>TUB1::LEU TEF::Mito-TagBFP::TRP | This study |
| 4422 | W303 NUM1 <sup>D315A</sup> $\Delta PH$ -yEGFP::HIS / pYX142-mito-RED::LEU                                                                                        | This study |
| 4423 | W303 NUM1 $\Delta EF$ $\Delta PH$ -yEGFP::HIS / pYX142-mito-RED::LEU                                                                                             | This study |
| 4475 | W303 $\Delta dyn1::NAT$ pHIS3p:mRuby2-TUB1::HYG                                                                                                                  | This study |
| 4476 | W303 NUM1 <sup>D315A</sup> $\Delta PH$ -yEGFP::HIS pHIS3p:mRuby2-<br>TUB1::HYG                                                                                   | This study |
| 4702 | W303 $\Delta Inp1::KAN$ NUM1-yEGFP::HIS PHO88-<br>mCherry::LEU                                                                                                   | This study |
| 4703 | W303 NUM1 $\Delta EF$ -yEGFP::HIS PHO88-mCherry::LEU                                                                                                             | This study |
| 4704 | W303 $\Delta Inp1::KAN$ NUM1 $\Delta EF$ -yEGFP::HIS PHO88-<br>mCherry::LEU                                                                                      | This study |
| 4705 | W303 NUM1 <sup>D315A</sup> -yEGFP::HIS PHO88-mCherry::LEU                                                                                                        | This study |
| 4706 | W303 $\Delta Inp1::KAN$ NUM1 <sup>D315A</sup> -yEGFP::HIS PHO88-<br>mCherry::LEU                                                                                 | This study |

|      |                                                                                                                             |            |
|------|-----------------------------------------------------------------------------------------------------------------------------|------------|
| 4979 | W303 <i>MMR1-AID-FLAG::HYG Δypt11::NAT TIR1::URA NUM1-yEGFP::KAN DYN1-yoHalo::HIS TEF::Mito-TagBFP::TRP</i>                 | This study |
| 4980 | W303 <i>MMR1-AID-FLAG::HYG Δypt11::NAT TIR1::URA NUM1ΔEF-yEGFP::HIS DYN1-yoHalo::KAN TEF::Mito-TagBFP::TRP</i>              | This study |
| 4981 | W303 <i>MMR1-AID-FLAG::HYG Δypt11::NAT TIR1::URA NUM1<sup>D315A</sup>-yEGFP::HIS DYN1-yoHalo::KAN TEF::Mito-TagBFP::TRP</i> | This study |
